# Supplementary material
Source: PubMed Central journal article supplement (PMC3494077)
Supplement: emmm0004-0791-SD1.pdf [file emmm0004-0791-SD1.pdf]

Manuscript EMM-2011-01140

**Loss of Stromal Androgen Receptor Leads to Suppressed Prostate Tumorigenesis via Modulation of Pro-inflammatory Cytokines/Chemokines**

Kuo-Pao Lai, Shinichi Yamashita, Chiung-Kuei Huang, Shuyuan Yeh and Chawnshang Chang

*Corresponding author: Chawnshang Chang, University of Rochester*

---

**Review timeline:**

Submission date:

07 December 2011

Accepted:

04 May 2012

---

**Transaction Report:**

No Peer Review Process File is available with this article, as the authors have chosen not to make the review process public in this case.
